# Supplementary material for: Multivariate Lipschitz Analysis of the Stability of Neural Networks
Source: Frontiers journal article supplement (doi:10.3389/frsip.2022.794469), 2022-04-05
Supplement: Presentation_1.pdf [file Presentation_1.pdf]

## APPENDICES

### 1 PROOF OF (39)

Let  $B(0, \sqrt{\eta})$  be the closed ball of  $\mathbb{R}^{N_0}$  with center 0 and radius  $\sqrt{\eta}$  and let  $S_{N_0-1}$  be the surface of the unit-radius sphere in  $\mathbb{R}^{N_0-1}$ . We have

$$\begin{aligned}
 P(z \in C_\eta) &= \frac{1}{(2\pi)^{N_0/2}(\det(\Omega))^{1/2}} \int_{C_\eta} \exp\left(-\frac{1}{2}z^\top \Omega^{-1}z\right) dz \\
 &= \frac{1}{(2\pi)^{N_0/2}} \int_{B(0, \sqrt{\eta})} \exp\left(-\frac{1}{2}\|u\|^2\right) du \\
 &= \frac{1}{(2\pi)^{N_0/2}} S_{N_0-1} \int_0^{\sqrt{\eta}} \rho^{N_0-1} \exp\left(-\frac{\rho^2}{2}\right) d\rho \\
 &= \frac{1}{(2\pi)^{N_0/2}} \frac{2(\pi)^{N_0/2}}{\Gamma(N_0/2)} \int_0^{\sqrt{\eta}} \rho^{N_0-1} \exp\left(-\frac{\rho^2}{2}\right) d\rho \\
 &= \frac{1}{\Gamma(N_0/2)} \int_0^{\frac{\eta}{2}} \zeta^{N_0/2-1} \exp(-\zeta) d\zeta \\
 &= \frac{\gamma(N_0/2, \eta/2)}{\Gamma(N_0/2)}.
 \end{aligned} \tag{66}$$

### 2 PROOFS OF PROPOSITION 3

(i): As  $\epsilon \rightarrow 0$ , the diagonal elements of  $\Omega_{\epsilon, \mathbb{K}_0}$  with index  $\ell \notin \mathbb{K}$  tend to zero, which in (47) amounts to assuming that the corresponding components of the input perturbation are zero. The existence of the limit  $\Omega_{0, \mathbb{K}_0}$  is secured based on the remark at the end of Section 3.2.

(ii): If  $\epsilon = 1$ , then  $\Omega_{\epsilon, \mathbb{K}_0} = \text{Id}_{N_0}$  and (47) reduces to (20).

(iii): For every  $i \in \{1, \dots, m-1\}$ , let  $\Lambda_i \in \mathcal{D}_{N_i}(\{2\alpha_i - 1, 1\})$ . Then, by using the triangle inequality,

$$\|W_m \Lambda_{m-1} \cdots \Lambda_1 W_1 (\Omega_{\epsilon, \mathbb{K}_0})^{1/2}\|_{p,q} \leq \|W_m \Lambda_{m-1} \cdots \Lambda_1 W_1 (\Omega_{\epsilon', \mathbb{K}_1})^{1/2}\|_{p,q} \|(\Omega_{\epsilon', \mathbb{K}_1})^{-1} \Omega_{\epsilon, \mathbb{K}_0}\|_{p,p}^{1/2}. \tag{67}$$

By taking the supremum of both sides with respect to the  $(\Lambda_i)_{1 \leq i \leq m-1}$  matrices, we deduce that

$$\vartheta_m^{\Omega_{\epsilon, \mathbb{K}_0}} \leq \|(\Omega_{\epsilon', \mathbb{K}_1})^{-1} \Omega_{\epsilon, \mathbb{K}_0}\|_{p,p}^{1/2} \vartheta_m^{\Omega_{\epsilon', \mathbb{K}_1}}. \tag{68}$$

On the other hand,

$$(\Omega_{\epsilon', \mathbb{K}_1})^{-1} \Omega_{\epsilon, \mathbb{K}_0} = \text{Diag}\left(\frac{\sigma_{\epsilon, \mathbb{K}_0, 1}^2}{\sigma_{\epsilon', \mathbb{K}_1, 1}^2}, \dots, \frac{\sigma_{\epsilon, \mathbb{K}_0, N_0}^2}{\sigma_{\epsilon', \mathbb{K}_1, N_0}^2}\right), \tag{69}$$

where, by using the fact that  $\Omega_{\epsilon, \mathbb{K}_0} \preceq \Omega_{\epsilon', \mathbb{K}_1}$ ,

$$(\forall \ell \in \{1, \dots, N_0\}) \quad \frac{\sigma_{\epsilon, \mathbb{K}_0, \ell}}{\sigma_{\epsilon', \mathbb{K}_1, \ell}} \leq 1. \tag{70}$$

Since  $(\Omega_{\epsilon', \mathbb{K}_1})^{-1} \Omega_{\epsilon, \mathbb{K}_0}$  is a diagonal matrix with elements lower than or equal to 1,  $\|(\Omega_{\epsilon', \mathbb{K}_1})^{-1} \Omega_{\epsilon, \mathbb{K}_0}\|_{p,p} \leq 1$  and it follows from (68) that

$$\vartheta_m^{\Omega_{\epsilon, \mathbb{K}_0}} \leq \vartheta_m^{\Omega_{\epsilon', \mathbb{K}_1}}. \quad (71)$$

(iv): Let  $(\epsilon, \epsilon') \in ]0, 1]^2$  with  $\epsilon < \epsilon'$ . We have  $\Omega_{\epsilon, \mathbb{K}_0} \preceq \Omega_{\epsilon', \mathbb{K}_0}$  and, according to (iii),

$$\vartheta_m^{\Omega_{\epsilon, \mathbb{K}_0}} \leq \vartheta_m^{\Omega_{\epsilon', \mathbb{K}_0}}. \quad (72)$$

(v): If  $\mathbb{K}_0 \subset \mathbb{K}_1$ , then  $\Omega_{\epsilon, \mathbb{K}_0} \preceq \Omega_{\epsilon, \mathbb{K}_1}$  and the result follows from (iii).

(vi): We have

$$\sum_{\substack{\mathbb{K} \subset \{1, \dots, N_0\} \\ \text{card } \mathbb{K} = K}} \Omega_{\epsilon, \mathbb{K}}^{1/2} = \left( \binom{N_0 - 1}{K - 1} + \left( \binom{N_0}{K} - \binom{N_0 - 1}{K - 1} \right) \epsilon \right) \text{Id}_{N_0}. \quad (73)$$

By using the relation

$$\binom{N_0}{K} = \frac{N_0}{K} \binom{N_0 - 1}{K - 1}, \quad (74)$$

we deduce that

$$\sum_{\substack{\mathbb{K} \subset \{1, \dots, N_0\} \\ \text{card } \mathbb{K} = K}} \Omega_{\epsilon, \mathbb{K}}^{1/2} = \omega_{K, \epsilon} \text{Id}_{N_0}. \quad (75)$$

For every  $i \in \{1, \dots, m - 1\}$ , let  $\Lambda_i \in \mathcal{D}_{N_i}(\{2\alpha_i - 1, 1\})$ . Then,

$$\begin{aligned} \|W_m \Lambda_{m-1} \cdots \Lambda_1 W_1\|_{p,q} &= \frac{1}{\omega_{K, \epsilon}} \left\| W_m \Lambda_{m-1} \cdots \Lambda_1 W_1 \left( \sum_{\substack{\mathbb{K} \subset \{1, \dots, N_0\} \\ \text{card } \mathbb{K} = K}} \Omega_{\epsilon, \mathbb{K}}^{1/2} \right) \right\|_{p,q} \\ &\leq \frac{1}{\omega_{K, \epsilon}} \sum_{\substack{\mathbb{K} \subset \{1, \dots, N_0\} \\ \text{card } \mathbb{K} = K}} \|W_m \Lambda_{m-1} \cdots \Lambda_1 W_1 \Omega_{\epsilon, \mathbb{K}}^{1/2}\|_{p,q}. \end{aligned} \quad (76)$$

We deduce that

$$\begin{aligned} \vartheta_m &= \sup_{\Lambda_1 \in \mathcal{D}_{N_1}(\{2\alpha_1 - 1, 1\})} \|W_m \Lambda_{m-1} \cdots \Lambda_1 W_1\|_{p,q} \\ &\quad \vdots \\ &\quad \Lambda_{m-1} \in \mathcal{D}_{N_{m-1}}(\{2\alpha_{m-1} - 1, 1\}) \\ &\leq \frac{1}{\omega_{K, \epsilon}} \sum_{\substack{\mathbb{K} \subset \{1, \dots, N_0\} \\ \text{card } \mathbb{K} = K}} \sup_{\substack{\Lambda_1 \in \mathcal{D}_{N_1}, \\ \vdots \\ \Lambda_{m-1} \in \mathcal{D}_{N_{m-1}}}} \|W_m \cdots \Lambda_1 W_1 \Omega_{\epsilon, \mathbb{K}}^{1/2}\|_{p,q} \\ &= \frac{1}{\omega_{K, \epsilon}} \sum_{\substack{\mathbb{K} \subset \{1, \dots, N_0\} \\ \text{card } \mathbb{K} = K}} \vartheta_m^{\Omega_{\epsilon, \mathbb{K}}}. \end{aligned} \quad (77)$$

Furthermore, according to (ii) and (iv), for every  $\mathbb{K} \subset \{1, \dots, N_0\}$ ,

$$\vartheta_m^{\Omega_{\epsilon, \mathbb{K}}} \leq \vartheta_m^{\Omega_{1, \mathbb{K}}} = \vartheta_m. \quad (78)$$

This yields

$$\max_{\substack{\mathbb{K} \subset \{1, \dots, N_0\} \\ \text{card } \mathbb{K} = K}} \vartheta_m^{\Omega_{\epsilon, \mathbb{K}}} \leq \vartheta_m. \quad (79)$$

(vii): The proof is similar to that of (vi) by noticing that, if  $\mathcal{P}$  is a partition of  $\{1, \dots, N_0\}$ , then

$$\sum_{\mathbb{K} \in \mathcal{P}} \Omega_{\epsilon, \mathbb{K}}^{1/2} = \omega_{\mathcal{P}, \epsilon} \text{Id}_{N_0}. \quad (80)$$

(viii): For every  $\emptyset \neq \mathbb{K} \subset \{1, \dots, N_0\}$ ,  $\vartheta_m^{\Omega_{\epsilon, \mathbb{K}}} = \vartheta_m^{\Omega_{0, \mathbb{K}}} + o(\epsilon)$ . It is thus sufficient to prove this inequality in the limit case when  $\epsilon \rightarrow 0$ . For every  $i \in \{1, \dots, m-1\}$ , let  $\Lambda_i \in \mathcal{D}_{N_i}(\{2\alpha_i - 1, 1\})$ . Let  $x \in \mathbb{R}^{N_0}$  and let  $x_{\mathbb{K}}$  be the projection of  $x$  onto the space of vectors whose components indexed by  $\{1, \dots, N_0\} \setminus \mathbb{K}$  are zero. We have thus  $x_{\mathbb{K}_0} = x_{\mathbb{K}_1} + x_{\mathbb{K}_2}$ . Then,

$$\begin{aligned} & \|W_m \Lambda_{m-1} \cdots \Lambda_1 W_1 \Omega_{0, \mathbb{K}_0}^{1/2} x\|_q \\ &= \|W_m \Lambda_{m-1} \cdots \Lambda_1 W_1 x_{\mathbb{K}_0}\|_q \\ &\leq \|W_m \Lambda_{m-1} \cdots \Lambda_1 W_1 x_{\mathbb{K}_1}\|_q + \|W_m \Lambda_{m-1} \cdots \Lambda_1 W_1 x_{\mathbb{K}_2}\|_q \\ &= \|W_m \Lambda_{m-1} \cdots \Lambda_1 W_1 \Omega_{0, \mathbb{K}_1}^{1/2} x_{\mathbb{K}_1}\|_q + \|W_m \Lambda_{m-1} \cdots \Lambda_1 W_1 \Omega_{0, \mathbb{K}_2}^{1/2} x_{\mathbb{K}_2}\|_q \\ &\leq \|W_m \Lambda_{m-1} \cdots \Lambda_1 W_1 \Omega_{0, \mathbb{K}_1}^{1/2}\|_{p, q} \|x_{\mathbb{K}_1}\|_p + \|W_m \Lambda_{m-1} \cdots \Lambda_1 W_1 \Omega_{0, \mathbb{K}_2}^{1/2}\|_{p, q} \|x_{\mathbb{K}_2}\|_p. \end{aligned} \quad (81)$$

By using Hölder's inequality, we deduce that

$$\begin{aligned} & \|W_m \Lambda_{m-1} \cdots \Lambda_1 W_1 \Omega_{0, \mathbb{K}_0}^{1/2} x\|_q \\ &\leq \left( \|W_m \cdots \Lambda_1 W_1 \Omega_{0, \mathbb{K}_1}^{1/2}\|_{p, q}^{p^*} + \|W_m \cdots \Lambda_1 W_1 \Omega_{0, \mathbb{K}_2}^{1/2}\|_{p, q}^{p^*} \right)^{1/p^*} (\|x_{\mathbb{K}_1}\|_p^p + \|x_{\mathbb{K}_2}\|_p^p)^{1/p}. \end{aligned} \quad (82)$$

Since  $\|x_{\mathbb{K}_1}\|_p^p + \|x_{\mathbb{K}_2}\|_p^p = \|x_{\mathbb{K}_0}\|_p^p$ , it follows that

$$\|W_m \Lambda_{m-1} \cdots \Lambda_1 W_1 \Omega_{0, \mathbb{K}_0}^{1/2}\|_{p, q} \leq \left( \|W_m \cdots \Lambda_1 W_1 \Omega_{0, \mathbb{K}_1}^{1/2}\|_{p, q}^{p^*} + \|W_m \cdots \Lambda_1 W_1 \Omega_{0, \mathbb{K}_2}^{1/2}\|_{p, q}^{p^*} \right)^{1/p^*}. \quad (83)$$

Taking the supremum with respect to  $(\Lambda_i)_{1 \leq i \leq m-1}$  and majorizing the supremum of the sum in the right-hand side by the sum of the suprema yield (53).
